# Supplementary material for: Membrane particles evoke a serotype-independent cross-protection against pneumococcal infection that is dependent on the conserved lipoproteins MalX and PrsA
Source: PubMed Central journal article supplement — Proc Natl Acad Sci U S A. 2022 Jun 1;119(23):e2122386119. doi: 10.1073/pnas.2122386119 (PMC9191655; doi:10.1073/pnas.2122386119), 2022-06-01
Supplement: pnas.2122386119.sapp.pdf [file pnas.2122386119.sapp.pdf]

## **Supplementary material for**

Membrane particles evoke a serotype-independent cross-protection against pneumococcal infection that is dependent on the conserved lipoproteins MalX and PrsA

Ana Rita Narciso<sup>1\*</sup>, Federico Iovino<sup>1\*</sup>, Sigrun Thorsdottir<sup>1</sup>, Peter Mellroth<sup>1□</sup>, Mario Codemo<sup>1</sup>, Christian Spoerry<sup>1</sup>, Francesco Righetti<sup>1</sup>, Sandra Muschiol<sup>1</sup>, Staffan Normark<sup>1</sup>, Priyanka Nannapaneni<sup>1</sup>, Birgitta Henriques-Normark<sup>1</sup>

<sup>1</sup>Department of Microbiology, Tumor and Cell Biology, Karolinska Institutet SE-171 64 Stockholm, and Clinical Microbiology, Karolinska University hospital, SE-171 76 Stockholm, Sweden.

\*Equal contribution

□Did not participate in the final version of the manuscript

### **Corresponding authors:**

Birgitta Henriques-Normark, birgitta.henriques@ki.se, and Staffan Normark, staffan.normark@ki.se

## Supplementary Figures

### Supplementary Figure S1. Membrane particles (MPs) produced by serotype 3 pneumococci are larger and contain more cytosolic proteins than MPs from serotype 4

**(A)** Size distribution of MPs from the serotype 3 strain BHN428 (n=523) and the serotype 4 strain T4 (n=378), as measured from electron micrographs. **(B)** Mass spectrometry identification of proteins present in MPs isolated from the serotype 3 and 4 strains respectively. The number indicates proteins found based on their predicted subcellular localization, defined as cytosolic, transmembrane, membrane-associated (lipoproteins), cell wall associated and secreted (see also Supplementary Table S1).

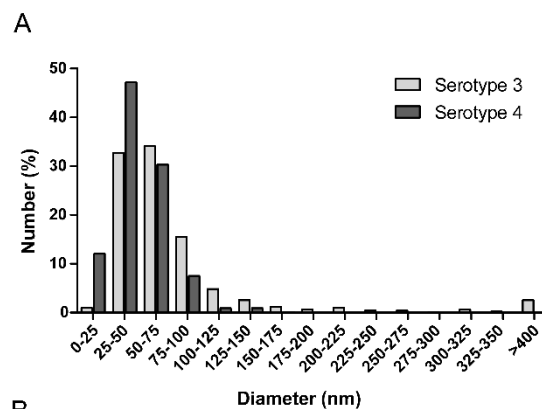

**B**

| Prediction of subcellular localization | Total no. of proteins |            |
|----------------------------------------|-----------------------|------------|
|                                        | Serotype 3            | Serotype 4 |
| Cytosolic                              | 320                   | 115        |
| Transmembrane                          | 53                    | 53         |
| Lipoproteins                           | 23                    | 26         |
| Cell wall                              | 2                     | 12         |
| Secreted proteins                      | 4                     | 10         |

## Supplementary Figure S2. Blood counts after intranasal immunization of mice with MPs and intranasal pneumococcal challenge in a 7-day survival model

(A-D) Intranasal immunization of C57BL/6 mice with MPs from strain T4 increases survival after intranasal challenge with strain BHN733 of serotype 1. Bacterial counts (CFU) in the blood of mice immunized with (A) PBS, (B) Adjuvant only, (C) MPs from T4, or (D) T4 MPs + adjuvant, and then infected with strain BHN733 of serotype 1, corresponding to the survival experiment in Figure 1A. Each dot represents one mouse. (E-H) Immunization of mice with MPs from serotype 3 protects against intranasal infection with the same strain. Bacterial counts (CFU) in the blood of mice immunized with (E) Adjuvant only, (F) MPs from serotype 3 + adjuvant or (G) MPs from serotype 4 + adjuvant, and then infected with strain BHN428 of serotype 3, corresponding to the survival experiment in Figure 1C. (H) CFU in the blood of mice deficient in B cells immunized with MPs from the serotype 3 strain BHN428, and then infected with the same strain (Figure 1C). In all graphs, each dot represents one mouse. (I-K) The cytotoxin pneumolysin does not affect the protective effect by MPs. CFU in the blood of mice immunized with (I) Adjuvant only, (J) MPs from T4 + adjuvant or (K) MPs from T4 $\Delta$ ply + adjuvant, and then infected with strain T4, corresponding to survival experiment in Figure 1E. Each dot represents one mouse.

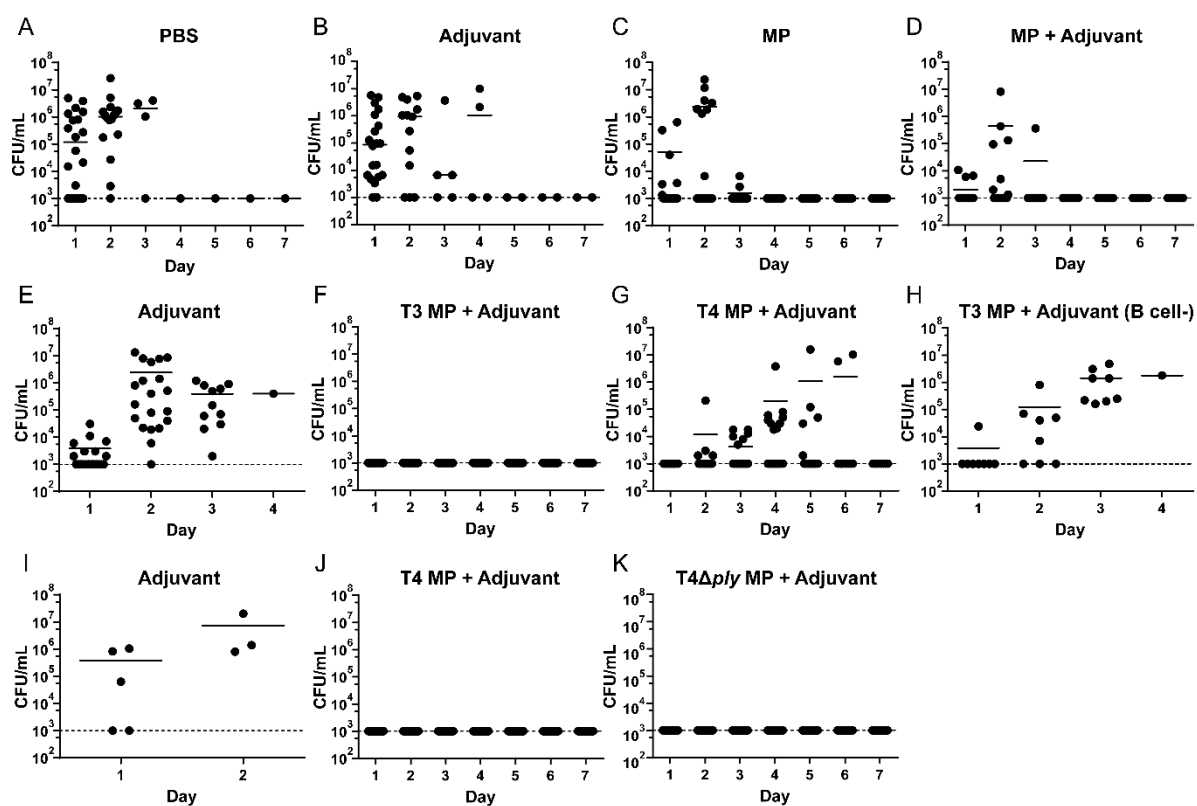

**Supplementary Figure S3. Immunization with EVs, as compared to MPs, from T4 confers lower cross-protection against intranasal infection with serotype 1**

Intranasal immunization of C57BL/6 mice with extracellular vesicles (EVs) from strain T4 of serotype 4 led to a lower survival and lower production of pneumococcal specific IgG as compared to immunization with MPs. **(A-B)** Using ELISA analysis, specific IgG was detected two weeks after the first immunization with EV (prior to the second immunization) and four weeks after the first immunization (2 weeks after the booster, prior to infection), in wells coated with **(A)** wild type T4, and **(B)** T4R (isogenic mutant in the capsule of T4) bacteria. Each dot represents one mouse serum. **(C)** Intranasal immunization of C57BL/6 mice with EVs from strain T4 of serotype 4 and infection with the strain BHN733 of serotype 1 led to lower survival (40%) compared to mice immunized with MPs from the same strain (see Figure 1). 20 mice per group. \* =  $p < 0.05$ , \*\* =  $p < 0.01$ . **(D)** Bacterial counts (CFU) detected in the lungs of immunized and infected mice from (C) after sacrifice. **(E-F)** CFU detected in the blood of mice immunized with **(E)** EVs only or **(F)** EVs + adjuvant. Each dot represents one mouse. This experiment was conducted in parallel with experiments presented in Fig. 1.

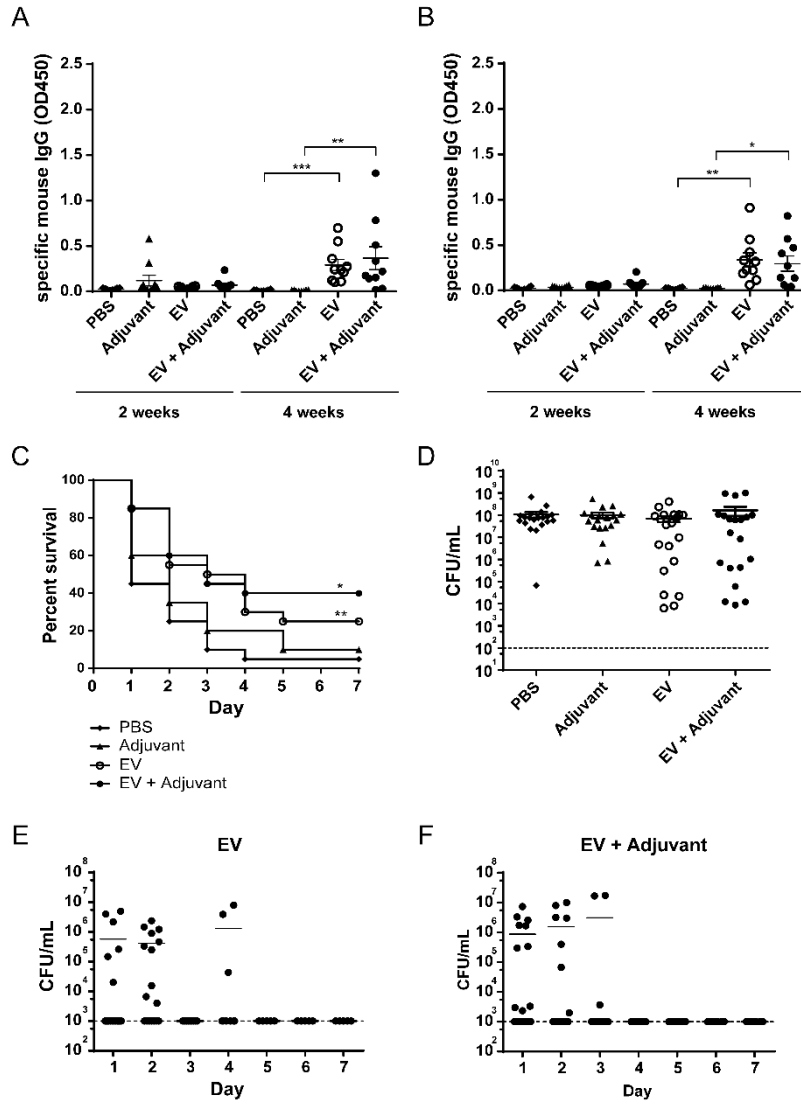

**Supplementary Figure S4. Blood counts and IgG levels after intranasal immunization with MPs from T4 $\Delta$ pspA and intranasal challenge with strains of serotype 1 and serotype 3**

Intranasal immunization with MPs of T4 or its isogenic mutant in PspA, T4 $\Delta$ pspA, subsequently followed by bacterial challenge with strains T4, serotype 1 (BHN733) or serotype 3 (BHN428), in a 7-day survival experiment, as shown in Figure 3C-E. **(A)** Number of bacteria (CFU) in the blood of mice, each dot represents one mouse. **(B)** Using ELISA assays, pneumococcal specific IgG was detected in wells coated with T4, serotype 1 or serotype 3 pneumococci. Each dot represents one mouse serum collected from mice used in the survival *in vivo* experiment showed in Figure 3C-E. \* =  $p < 0.05$ ; \*\* =  $p < 0.01$ ; n.s. – not significant.

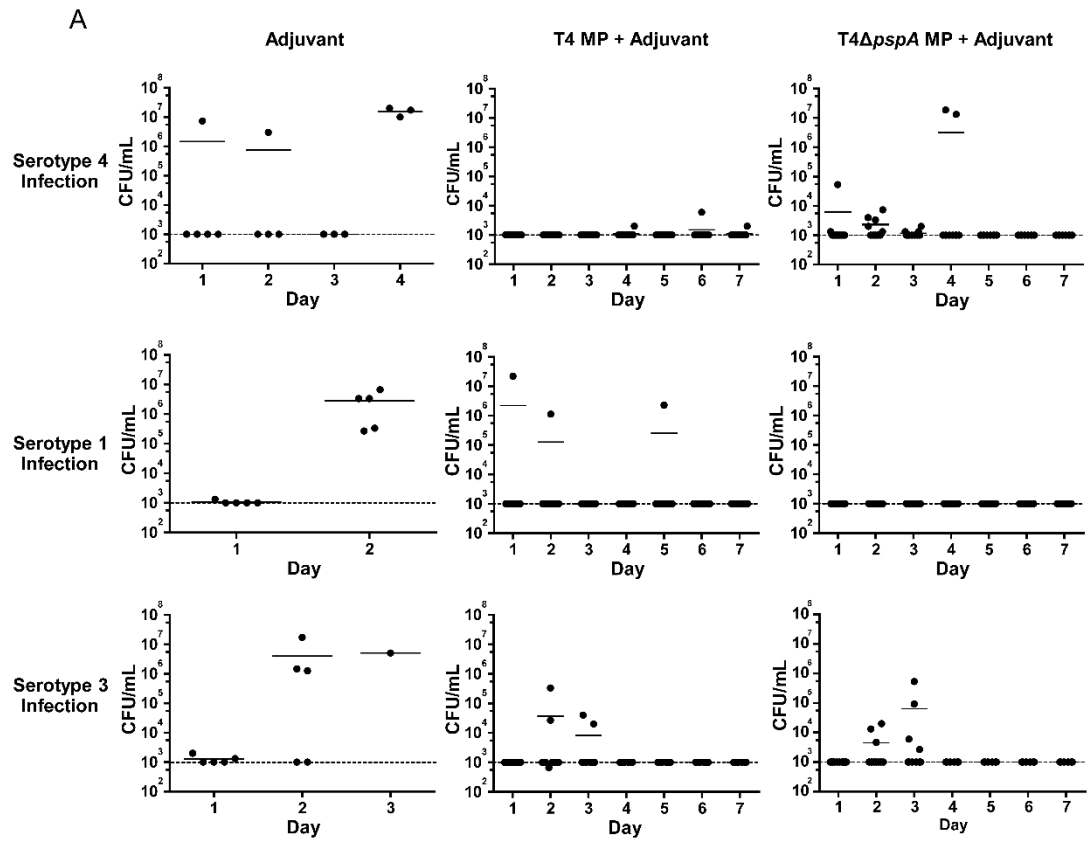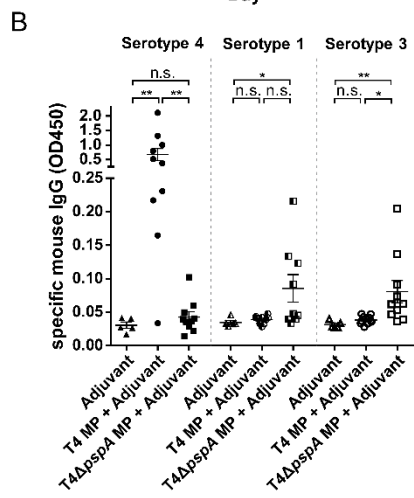

**Supplementary Figure S5. Blood counts and IgG levels after intranasal immunization with MPs from T4 $\Delta$ pspA $\Delta$ malX $\Delta$ prsA and intranasal challenge with the pneumococcal strains T4, serotype 1 or serotype 3**

Intranasal immunization with MPs from T4, T4 $\Delta$ pspA or T4 $\Delta$ pspA $\Delta$ malX $\Delta$ prsA, subsequently followed by bacterial challenge with strains T4, serotype 1 (BHN733) or 3 (BHN428), in a 7-day survival experiment, as shown in Figure 4C-E. **(A)** Number of bacteria (CFU) in the blood of mice, each dot represents one mouse. **(B)** Using ELISA analysis, pneumococcal specific IgG was detected in wells coated with T4, serotype 1 and serotype 3 pneumococci respectively. Each dot represents one mouse serum collected from mice used in the survival *in vivo* experiment showed in Figure 4C-E. \* =  $p < 0.05$ ; \*\* =  $p < 0.01$ ; \*\*\* =  $p < 0.001$ ; n.s. – not significant.



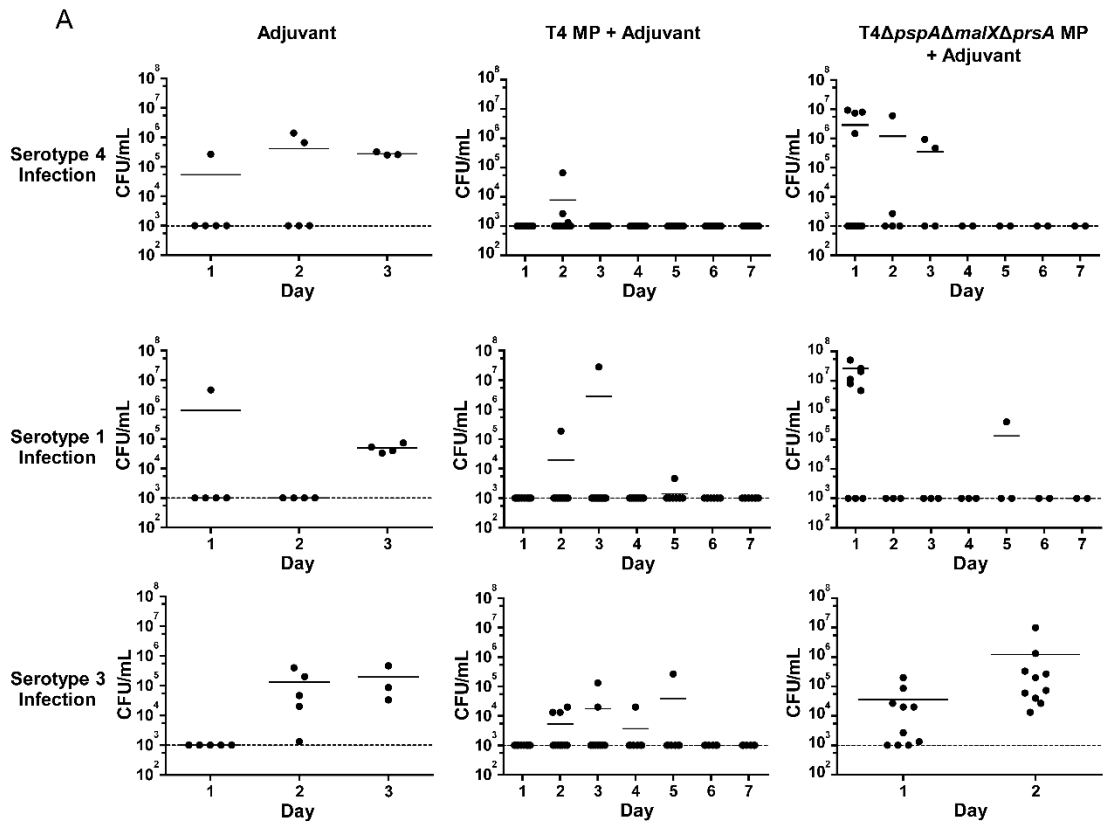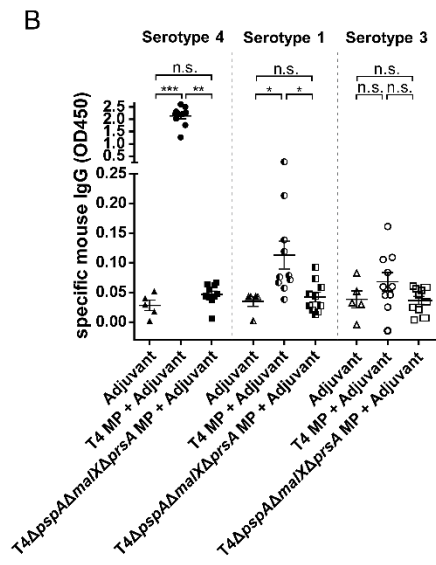

### Supplementary Figure S6. Blood counts showing that presence of both MalX and PrsA in MPs are required for protection against invasive pneumococcal disease by serotype 1

(A-F) Intranasal immunization with MPs from different T4 mutants, subsequently followed by bacterial challenge with a serotype 1 (BHN733) strain, in a 7-day survival experiment, as shown in Figure 5A, B. CFU in the blood of mice is shown for the groups immunized with (A) T4 MP+Adjuvant, (B) T4 $\Delta$ *pspA* $\Delta$ *malX* MP+adjuvant, (C) T4 $\Delta$ *pspA* $\Delta$ *prxA* MP+adjuvant, (D) T4 $\Delta$ *malX* $\Delta$ *prxA* MP+adjuvant, (E) T4 $\Delta$ *pspA* $\Delta$ *malX* $\Delta$ *prxA* MP+adjuvant and (F) adjuvant only. Each dot represents one mouse.

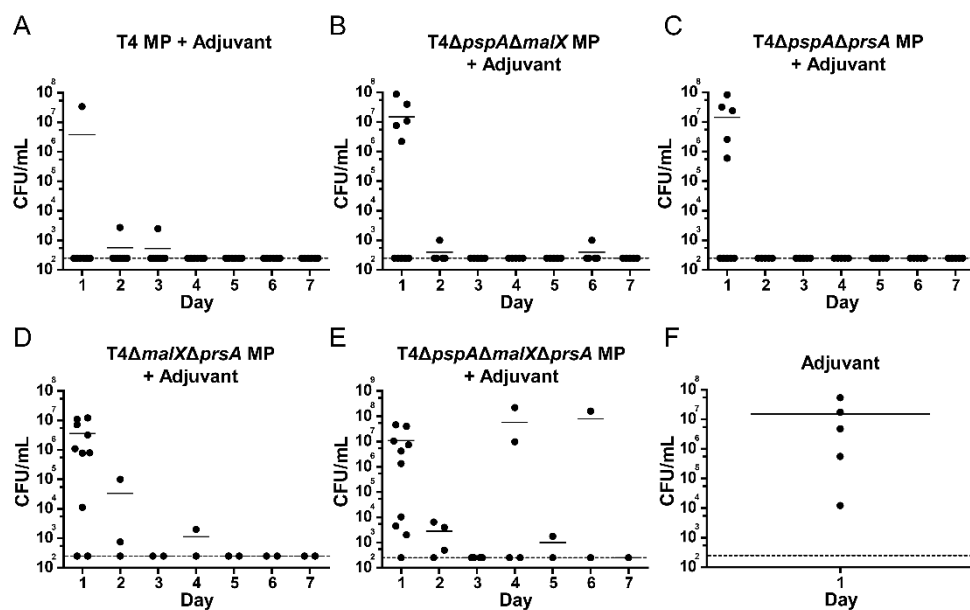

**Supplementary Figure S7. Density-colored dot plots of the flow cytometry data displayed in Figure 5C.**

Bacterial cells of *S. pneumoniae* serotypes 1, 3, 4 and uncapsulated serotype 4 (T4R), were incubated with sera from mice immunized with MPs harvested from the indicated pneumococcal strains. Subsequently, the bacteria were stained with antibody Alexa Fluor® 488 goat anti-mouse IgG (H+L) and analyzed by flow cytometry to determine the percentage of bacteria bound to mice IgGs, indicated below the gate windows and plotted in Figure 5C. Side scattering (SSC) versus fluorescence (Bound IgG) plots are displayed and the gating was determined based on the cells distribution in the control samples where the bacteria were not incubated with sera.

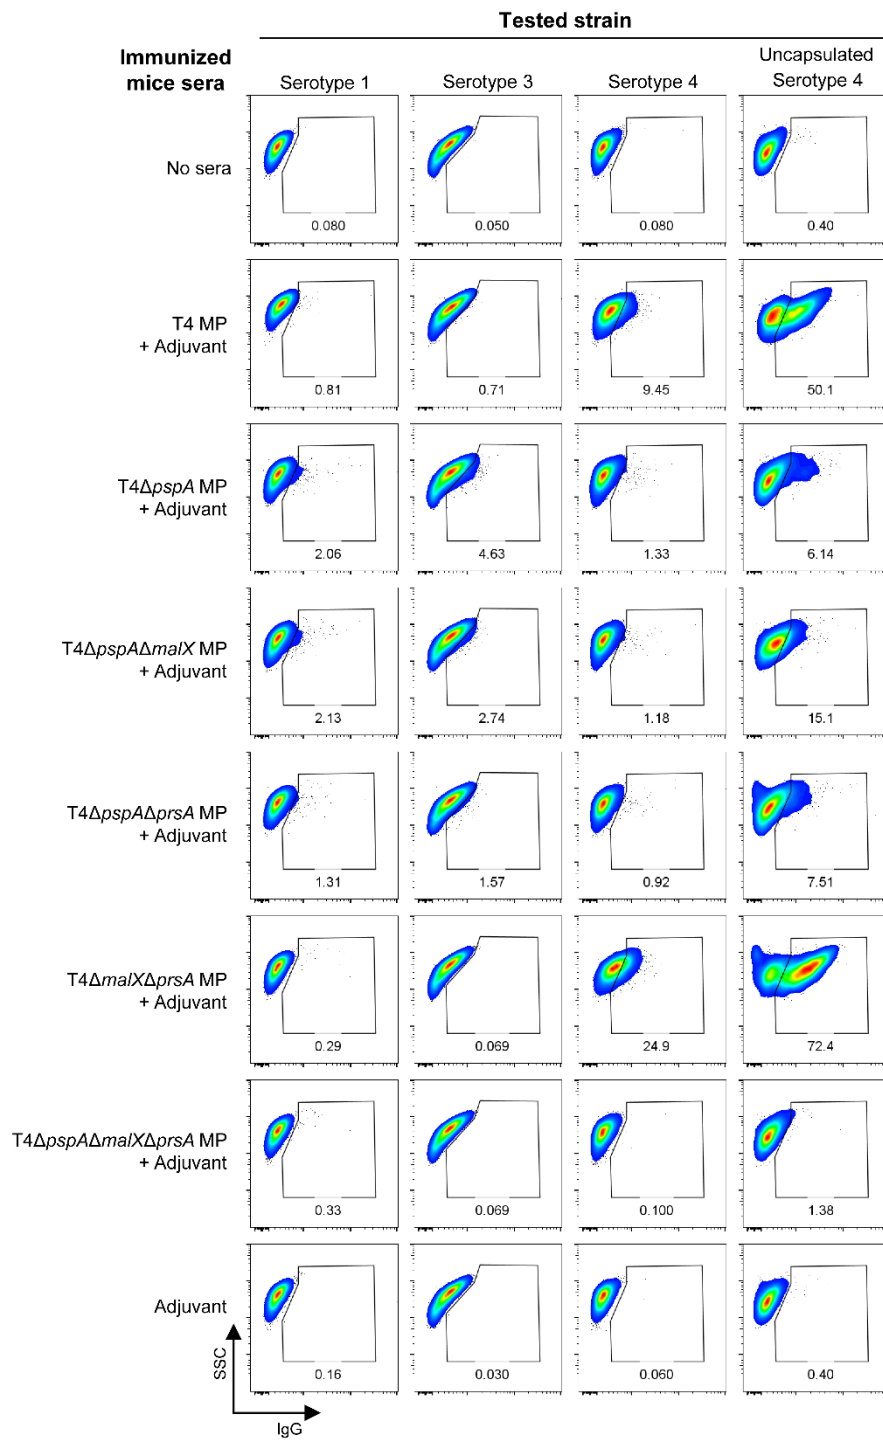

**Supplementary Figure S8. Opsonophagocytic activity of cross-reactive antibodies.** RAW mouse macrophages were incubated with serotype 1 pneumococci pre-treated with pooled sera from mice immunized with Adjuvant or T4 MP+adjuvant. **(A)** Bacterial adhesion to the cells was measured. **(B)** The effect on phagocytic killing by adding the sera in (A) was estimated by calculating bacterial survival inside the cells. Data are represented as means  $\pm$  SEM of three independent experiments. \* =  $p < 0.05$ .

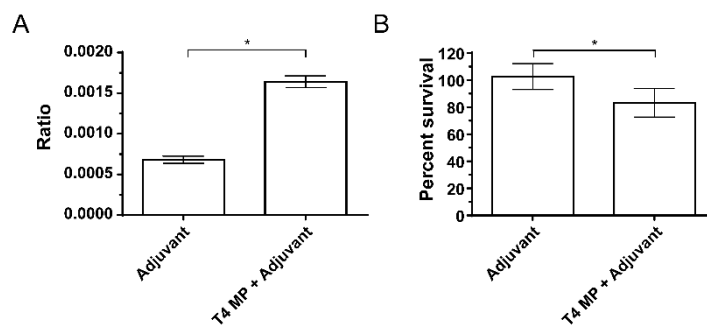

## Supplementary Tables

**Supplementary Table S1.** Proteins identified with LC-MS/MS after immunoprecipitation with immune sera from mice immunized with MPs from T4

| Accession   | Protein | Gene number | Annotation                              | Score | Coverage | # Unique Peptides | # Peptides | MW [kDa] | pI    |
|-------------|---------|-------------|-----------------------------------------|-------|----------|-------------------|------------|----------|-------|
| P95829      | DnaK    | SP_0517     | Chaperone protein                       | 42,90 | 33,94    | 12                | 12         | 64,8     | 4,77  |
| A0A0H2U MZ8 | PspA    | SP_0117     | Pneumococcal surface protein A          | 23,97 | 16,40    | 7                 | 7          | 82,7     | 4,91  |
| A0A0H2U NM7 | RrgB    | SP_0463     | Cell wall surface anchor family protein | 9,68  | 10,08    | 4                 | 4          | 71,3     | 5,15  |
| Q97SV2      | RplB    | SP_0212     | 50S ribosomal protein L2                | 9,13  | 31,77    | 5                 | 5          | 29,9     | 10,68 |
| P61182      | RplV    | SP_0214     | 50S ribosomal protein L22               | 8,67  | 42,98    | 3                 | 3          | 12,2     | 10,76 |
| P06653      | LytA    | SP_1937     | Autolysin                               | 6,54  | 11,95    | 3                 | 3          | 36,5     | 5,34  |
| P59213      | MalX    | SP_2108     | Maltose/maltodextrin-binding protein    | 6,33  | 8,51     | 3                 | 3          | 45,3     | 5,22  |
| Q97SU6      | RplR    | SP_0226     | 50S ribosomal protein L18               | 5,83  | 29,66    | 2                 | 2          | 12,9     | 10,40 |
| P66359      | RpsK    | SP_0235     | 30S ribosomal protein S11               | 3,74  | 22,05    | 2                 | 2          | 13,4     | 11,43 |

**Supplementary Table S2.** Proteins identified with LC-MS/MS after immunoprecipitation with immune sera from mice immunized with MPs from *T4ΔpspA*

| Accession   | Protein | Gene number | Annotation                              | Score | Coverage | # Unique Peptides | # Peptides | MW [kDa] | pI    |
|-------------|---------|-------------|-----------------------------------------|-------|----------|-------------------|------------|----------|-------|
| Q97R51      | PrsA    | SP_0981     | Foldase protein                         | 81,08 | 53,99    | 21                | 21         | 34,4     | 5,12  |
| P59213      | MalX    | SP_2108     | Maltose/maltodextrin-binding protein    | 77,02 | 63,36    | 22                | 22         | 45,3     | 5,22  |
| P95829      | DnaK    | SP_0517     | Chaperone protein                       | 42,96 | 37,40    | 16                | 16         | 64,8     | 4,77  |
| Q97SV2      | RplB    | SP_0212     | 50S ribosomal protein L2                | 25,95 | 40,79    | 8                 | 8          | 29,9     | 10,68 |
| P61182      | RplV    | SP_0214     | 50S ribosomal protein L22               | 24,40 | 58,77    | 5                 | 5          | 12,2     | 10,76 |
| A0A0H2U MZ8 | PspA    | SP_0117     | Pneumococcal surface protein A          | 22,64 | 20,70    | 8                 | 8          | 82,7     | 4,91  |
| A0A0H2U NM7 | RrgB    | SP_0463     | Cell wall surface anchor family protein | 17,81 | 15,04    | 6                 | 6          | 71,3     | 5,15  |
| P66112      | RplT    | SP_0961     | 50S ribosomal protein L20               | 12,36 | 41,18    | 4                 | 4          | 13,7     | 10,83 |
| P66524      | RpsU    | SP_1414     | 30S ribosomal protein S21               | 10,67 | 34,48    | 4                 | 4          | 7,0      | 11,30 |
| Q97SQ4      | RpsG    | SP_0272     | 30S ribosomal protein S7                | 10,51 | 23,72    | 4                 | 4          | 17,7     | 10,51 |
| P06653      | LytA    | SP_1937     | Autolysin                               | 9,28  | 27,36    | 7                 | 7          | 36,5     | 5,34  |
| A0A0H2U RD1 |         | SP_1683     | Sugar ABC transporter                   | 7,06  | 12,67    | 4                 | 4          | 48,3     | 5,44  |
| Q2MGH6      |         | SP_0368     | Endo-alpha-N-acetylgalactosaminidase    | 6,97  | 4,47     | 7                 | 7          | 195,9    | 6,07  |
| P18791      | AmiA    | SP_1891     | Oligopeptide-binding protein            | 6,62  | 6,37     | 3                 | 3          | 72,4     | 5,06  |
| P66581      | RpsE    | SP_0227     | 30S ribosomal protein S5                | 6,58  | 24,39    | 3                 | 3          | 17,0     | 9,52  |
| P65144      | InfC    | SP_0959     | Translation initiation factor IF-3      | 5,40  | 16,22    | 2                 | 2          | 21,2     | 9,85  |
| Q97SU6      | RplR    | SP_0226     | 50S ribosomal protein L18               | 4,91  | 29,66    | 2                 | 2          | 12,9     | 10,40 |
| Q97QS2      | Eno     | SP_1128     | Enolase                                 | 4,87  | 11,29    | 3                 | 3          | 47,1     | 4,81  |
| A0A0H2U QS8 | MltG    | SP_1518     | Endolytic murein transglycosylase       | 4,70  | 10,89    | 5                 | 5          | 60,8     | 5,16  |
| Q97SN4      | RpsI    | SP_0295     | 30S ribosomal protein S9                | 4,68  | 16,92    | 2                 | 2          | 14,2     | 10,86 |
| P64030      | EF-Tu   | SP_1489     | Elongation factor Tu                    | 4,49  | 13,07    | 4                 | 4          | 43,9     | 4,97  |
| Q9L7Q2      | ZmpB    | SP_0664     | Zinc metalloprotease                    | 4,41  | 4,25     | 5                 | 5          | 213,4    | 5,25  |
| A0A0H2U PZ3 | Hup     | SP_1113     | DNA-binding protein HU                  | 4,40  | 35,16    | 2                 | 2          | 9,6      | 9,48  |
| P0A4C3      | RpsC    | SP_0215     | 30S ribosomal protein S3                | 4,06  | 12,44    | 2                 | 2          | 24,0     | 9,70  |
| P66359      | RpsK    | SP_0235     | 30S ribosomal protein S11               | 3,85  | 21,26    | 2                 | 2          | 13,4     | 11,43 |
| A0A0H2U NF0 | RplM    | SP_0294     | 50S ribosomal protein L13               | 3,72  | 14,19    | 2                 | 2          | 16,1     | 9,95  |
| A0A0H2X FA2 | LytC    | SP_1573     | Lysozyme                                | 3,16  | 4,69     | 2                 | 2          | 57,3     | 6,93  |
| A0A0H2U S50 | CbpA    | SP_2190     | Choline binding protein A               | 2,90  | 9,96     | 3                 | 3          | 77,7     | 5,81  |
| P66565      | RpsD    | SP_0085     | 30S ribosomal protein S4                | 2,59  | 11,33    | 2                 | 2          | 23,0     | 10,15 |
| P0A4A7      | RpsL    | SP_0271     | 30S ribosomal protein S12               | 2,21  | 15,33    | 2                 | 2          | 15,1     | 11,53 |
| Q97T80      | ZmpC    | SP_0071     | Zinc metalloprotease                    | 1,95  | 6,52     | 8                 | 8          | 206,6    | 5,57  |
| Q04707      | PBP-1A  | SP_0369     | Penicillin-binding protein 1A           | 1,93  | 5,29     | 3                 | 3          | 79,7     | 5,60  |

**Supplementary Table S3.** Proteins identified with LC-MS/MS after immunoprecipitation with sera from mice challenged with adjuvant only

| Accession  | Protein | Gene number | Annotation                              | Score | Coverage | # Unique Peptides | # Peptides | MW [kDa] | pI    |
|------------|---------|-------------|-----------------------------------------|-------|----------|-------------------|------------|----------|-------|
| P95829     | DnaK    | SP_0517     | Chaperone protein                       | 64,30 | 51,24    | 23                | 23         | 64,8     | 4,77  |
| A0A0H2UNM7 | RrgB    | SP_0463     | Cell wall surface anchor family protein | 18,23 | 28,42    | 13                | 13         | 71,3     | 5,15  |
| Q97SV2     | RplB    | SP_0212     | 50S ribosomal protein L2                | 16,80 | 32,13    | 6                 | 6          | 29,9     | 10,68 |
| P61182     | RplV    | SP_0214     | 50S ribosomal protein L22               | 14,97 | 52,63    | 4                 | 4          | 12,2     | 10,76 |
| A0A0H2UMZ8 | PspA    | SP_0117     | Pneumococcal surface protein A          | 14,78 | 14,11    | 5                 | 5          | 82,7     | 4,91  |
| Q97SQ4     | RpsG    | SP_0272     | 30S ribosomal protein S7                | 8,81  | 19,23    | 2                 | 2          | 17,7     | 10,51 |
| P64030     | EF-Tu   | SP_1489     | Elongation factor Tu                    | 6,97  | 10,80    | 3                 | 3          | 43,9     | 4,97  |
| P06653     | LytA    | SP_1937     | Autolysin                               | 6,82  | 26,10    | 7                 | 7          | 36,5     | 5,34  |
| Q97SU6     | RplR    | SP_0226     | 50S ribosomal protein L18               | 6,42  | 37,29    | 3                 | 3          | 12,9     | 10,40 |
| Q97P19     | RpsO    | SP_1626     | 30S ribosomal protein S15               | 5,70  | 21,35    | 3                 | 3          | 10,5     | 10,18 |
| P66359     | RpsK    | SP_0235     | 30S ribosomal protein S11               | 5,43  | 33,07    | 3                 | 3          | 13,4     | 11,43 |
| P65144     | InfC    | SP_0959     | Translation initiation factor IF-3      | 5,40  | 16,22    | 2                 | 2          | 21,2     | 9,85  |
| P0A4C3     | RpsC    | SP_0215     | 30S ribosomal protein S3                | 5,19  | 19,35    | 3                 | 3          | 24,0     | 9,70  |
| Q2MGH6     |         | SP_0368     | Endo-alpha-N-acetylgalactosaminidase    | 3,91  | 1,70     | 3                 | 3          | 195,9    | 6,07  |
| A0A0H2XFA2 | LytC    | SP_1573     | Lysozyme                                | 2,85  | 4,69     | 2                 | 2          | 57,3     | 6,93  |
| P66565     | RpsD    | SP_0085     | 30S ribosomal protein S4                | 2,69  | 10,34    | 2                 | 2          | 23,0     | 10,15 |
| P18791     | AmiA    | SP_1891     | Oligopeptide-binding protein            | 2,52  | 5,16     | 3                 | 3          | 72,4     | 5,06  |
| P66524     | RpsU    | SP_1414     | 30S ribosomal protein S21               | 2,49  | 34,48    | 4                 | 4          | 7,0      | 11,30 |
| A0A0H2UNF0 | RplM    | SP_0294     | 50S ribosomal protein L13               | 2,44  | 14,19    | 2                 | 2          | 16,1     | 9,95  |
| P66112     | RplT    | SP_0961     | 50S ribosomal protein L20               | 2,29  | 29,41    | 2                 | 2          | 13,7     | 10,83 |
| P66581     | RpsE    | SP_0227     | 30S ribosomal protein S5                | 2,16  | 18,90    | 2                 | 2          | 17,0     | 9,52  |
| A0A0H2US50 | CbpA    | SP_2190     | Choline binding protein A               | 2,12  | 4,91     | 2                 | 2          | 77,7     | 5,81  |
| Q9L7Q2     | ZmpB    | SP_0664     | Zinc metalloprotease                    | 2,01  | 2,47     | 3                 | 3          | 213,4    | 5,25  |
| P0A4A7     | RpsL    | SP_0271     | 30S ribosomal protein S12               | 2,00  | 15,33    | 2                 | 2          | 15,1     | 11,53 |
| Q97QP7     | ZmpA    | SP_1154     | Immunoglobulin A1 protease              | 1,69  | 1,25     | 2                 | 2          | 223,8    | 5,38  |



**Supplementary Table S4.** *S. pneumoniae* strains used in this study

| <b>Strain</b>                                                                       | <b>Identifier</b> | <b>Comment</b>                                                                                                                                                                                     |
|-------------------------------------------------------------------------------------|-------------------|----------------------------------------------------------------------------------------------------------------------------------------------------------------------------------------------------|
| T4 (TIGR4)                                                                          | BHN38             | Wild-type TIGR4 serotype 4                                                                                                                                                                         |
| Serotype 1                                                                          | BHN733            | Wild-type serotype 1                                                                                                                                                                               |
| Serotype 3                                                                          | BHN428            | Wild-type serotype 3                                                                                                                                                                               |
| T4 $\Delta$ <i>pspA::ermB</i>                                                       | BHN2258           | <i>pspA</i> (SP0117) replaced with an <i>ermB</i> cassette (promoter plus Orf)                                                                                                                     |
| T4 $\Delta$ <i>malX::kanR</i>                                                       | BHN1696           | <i>malX</i> (SP2108) Orf replaced with a <i>kanR</i> Orf                                                                                                                                           |
| T4 $\Delta$ <i>prsA::tetM</i>                                                       | BHN1697           | <i>prsA</i> (SP0981) Orf replaced with a <i>tetM</i> Orf                                                                                                                                           |
| T4 $\Delta$ <i>pspA::ermB</i> $\Delta$ <i>malX::kanR</i>                            | BHN1698           | <i>pspA</i> (SP0117) replaced with an <i>ermB</i> cassette (promoter plus Orf); <i>malX</i> (SP2108) Orf replaced with a <i>kanR</i> Orf                                                           |
| T4 $\Delta$ <i>pspA::ermB</i> $\Delta$ <i>prsA::tetM</i>                            | BHN1699           | <i>pspA</i> (SP0117) replaced with an <i>ermB</i> cassette (promoter plus Orf); <i>prsA</i> (SP0981) Orf replaced with a <i>tetM</i> Orf                                                           |
| T4 $\Delta$ <i>prsA::tetM</i> $\Delta$ <i>malX::kanR</i>                            | BHN2044           | <i>prsA</i> (SP0981) Orf replaced with a <i>tetM</i> Orf; <i>malX</i> (SP2108) Orf replaced with a <i>kanR</i> Orf                                                                                 |
| T4 $\Delta$ <i>pspA::ermB</i> $\Delta$ <i>prsA::tetM</i> $\Delta$ <i>malX::kanR</i> | BHN1700           | <i>pspA</i> (SP0117) replaced with an <i>ermB</i> cassette (promoter plus Orf); <i>prsA</i> (SP0981) Orf replaced with a <i>tetM</i> Orf; <i>malX</i> (SP2108) Orf replaced with a <i>kanR</i> Orf |

**Supplementary Table S5.** Primers used in this study

| Primer               | Sequence <sup>1</sup>                               | Comment                                                                                                                          |
|----------------------|-----------------------------------------------------|----------------------------------------------------------------------------------------------------------------------------------|
| pspA-UpFr-800        | ggagttgtcgttgaaattac                                | Anneals ~800bp upstream of <i>pspA</i> Start codon                                                                               |
| pspA-UpFr-700        | gtatttagagatttcaaagtg                               | Anneals ~700bp upstream of <i>pspA</i> Start codon                                                                               |
| pspA-UpRe-ErmCass-OH | TGCAAGTCACACGAACACGAAC<br>taaatttacctctttctgatag    | Anneals directly upstream of <i>pspA</i> start codon with an overhang seq. complementary to the <i>ermB</i> cassette             |
| pspA-DoFr-ErmCass-OH | CTATTATTTAACGGGAGGAAAT<br>AAGccgattaaattaaatcatg    | Anneals directly downstream of <i>pspA</i> stop codon with an overhang seq. complementary to the <i>ermB</i> cassette            |
| pspA-DoRe-700bp      | acgtccggatttggcgtgc                                 | Anneals ~700bp downstream of <i>pspA</i> Stop codon                                                                              |
| pspA-DoRe-800bp      | ccactcgagcataatgcc                                  | Anneals ~800bp downstream of <i>pspA</i> Stop codon                                                                              |
| Erm-cass-frw         | ttcgtgttcgtgtgacttgca                               |                                                                                                                                  |
| Erm-cass-rev         | ttatttctcccgttaaataatag                             |                                                                                                                                  |
| prsA-UpFr-800        | aggattggcataaaaatggttg                              | Anneals ~800bp upstream of <i>prsA</i> Start codon                                                                               |
| prsA-UpFr-700        | ggtttcttgaaagaattgga                                | Anneals ~700bp upstream of <i>prsA</i> Start codon                                                                               |
| prsA-UpRe-TetOH      | TAATTTTCATGTGATTTTCCTC<br>CATgtctactcctttgagataagtg | Anneals directly upstream of <i>prsA</i> start codon with an overhang seq. complementary to the beginning of the <i>tetM</i> Orf |
| prsA-DoFr-TetOH      | ATATATGTTCAATAAAATAACT<br>TAGtccaaatcaatgagtcagggga | Anneals directly upstream of <i>prsA</i> stop codon with an overhang seq. complementary to the end of the <i>tetR</i> Orf        |
| prsA-DoRe-800        | caagtttatctacaacctca                                | Anneals ~800bp downstream of <i>prsA</i> Stop codon                                                                              |
| prsA-DoRe-700        | aacgcatcatatcaggtgtac                               | Anneals ~700bp downstream of <i>prsA</i> Stop codon                                                                              |
| TetOrf-frw           | atggaggaaaatcacatgaaaatta                           |                                                                                                                                  |
| TetOrf-rev           | ctaagttattttattgaacatatat                           |                                                                                                                                  |
| malX-UpFr-800        | gcttccaacaaaccttgctc                                | Anneals ~800bp upstream of <i>malX</i> Start codon                                                                               |
| malX-UpFr-700        | gctcctaagtgaaggatttg                                | Anneals ~700bp upstream of <i>malX</i> Start codon                                                                               |
| malX-UpRe-KanOH      | ctattcttaggaggaatacactATGGC<br>TAAATGAGAATATCA      | Anneals directly upstream of <i>malX</i> start codon with an overhang seq. complementary to the beginning of the <i>kanR</i> Orf |
| malX-DoFr-KanOH      | acccccttgaacaaatcttCTAAAC<br>AATTCATCCAGTAAA        | Anneals directly upstream of <i>malX</i> stop codon with an overhang seq. complementary to the end of the <i>kanR</i> Orf        |
| malX-DoRe-800        | gaaaataacaccaaagatagct                              | Anneals ~800bp downstream of <i>malX</i> Stop codon                                                                              |
| malX-DoRe-700        | agcccaaatgatagccaag                                 | Anneals ~700bp downstream of <i>malX</i> Stop codon                                                                              |
| KanOrf-frw           | atggctaaaatgagaatatca                               |                                                                                                                                  |
| KanOrf-rev           | ctaaaacaattcatccagtaaa                              |                                                                                                                                  |

Notes: <sup>1</sup> annealing sequences in lower case and non-annealing overhang sequences in upper case letters
